# Supplementary material for: Association of Maternal Longitudinal Hemoglobin with Small for Gestational Age during Pregnancy: A Prospective Cohort Study
Source: MDPI journal article supplement (doi:10.3390/nu14071403), 2022-03-28
Supplement: s1 [file s1]

Supplement Table S1. Associations between Hb concentrations and SGA in middle and late pregnancy in women without gestational hypertension or preeclampsia.

| Hb concentrations, g/L | n    | SGA<br>[n (%)] | Model 1 <sup>†</sup> | Model 2 <sup>‡</sup> | Model 3 <sup>§</sup> |
|------------------------|------|----------------|----------------------|----------------------|----------------------|
|                        |      |                | RR (95% CI)          | aRR (95% CI)         | aRR (95% CI)         |
| Mid-pregnancy          | 3057 |                |                      |                      |                      |
| ≥130                   | 212  | 16 (7.6)       | 1.21 (0.72, 2.03)    | 1.41 (0.84, 2.36)    | 1.41 (0.84, 2.36)    |
| 120–129                | 941  | 62 (6.6)       | 1.06 (0.77, 1.45)    | 1.10 (0.80, 1.52)    | 1.10 (0.80, 1.52)    |
| 110–119                | 1298 | 81 (6.2)       | Reference            | Reference            | Reference            |
| <110                   | 606  | 36 (5.9)       | 0.95 (0.65, 1.39)    | 0.86 (0.60, 1.25)    | 0.86 (0.60, 1.25)    |
| Late pregnancy         | 3057 |                |                      |                      |                      |
| ≥130                   | 358  | 41 (11.5)      | 2.01 (1.38, 2.93)    | 2.27 (1.55, 3.33)    | 2.29 (1.57, 3.36)*   |
| 120–129                | 790  | 57 (7.2)       | 1.27 (0.89, 1.80)    | 1.24 (0.88, 1.76)    | 1.25 (0.88, 1.77)    |
| 110–119                | 1052 | 60 (5.7)       | Reference            | Reference            | Reference            |
| <110                   | 857  | 37 (4.3)       | 0.76 (0.51, 1.13)    | 0.69 (0.47, 1.03)    | 0.69 (0.47, 1.03)    |

Hb, hemoglobin; SGA, small for gestational age; RR, hazard ratio; CI, confidence interval; aRR, adjusted risk ratio.

<sup>†</sup>Model 1 unadjusted any covariates.

<sup>‡</sup>Model 2 adjusted for maternal age, ethnicity, education level, average personal income, pre-pregnancy BMI, active or passive smoking, alcohol consumption, parity, gestational weight gain and newborn gender.

<sup>§</sup>Model 3 included model 2 covariates and iron-containing supplement. \*P<0.001

Supplement Table S2. Associations between longitudinal Hb change and SGA in women without gestational hypertension or preeclampsia, stratified by Hb in late pregnancy.

|                          | n   | Hb-middle<br>Mean $\pm$ SD | Hb-late<br>Mean $\pm$ SD | Iron<br>supplement<br>[n (%)] | SGA<br>[n (%)] | Adjusted Model <sup>†</sup><br>Adjusted RR (95% CI) |
|--------------------------|-----|----------------------------|--------------------------|-------------------------------|----------------|-----------------------------------------------------|
| Hb-late < 130            |     |                            |                          |                               |                |                                                     |
| Hb change < -6.0 g/L     | 885 | 120.2 $\pm$ 7.9            | 107.0 $\pm$ 8.9          | 442 (49.9)                    | 30 (3.4)       | 0.55 (0.36, 0.84)*                                  |
| Hb change -6.0 ~ 1.9 g/L | 859 | 116.6 $\pm$ 7.7            | 114.2 $\pm$ 7.8          | 457 (53.2)                    | 57 (6.6)       | Reference                                           |
| Hb change $\geq$ 2.0 g/L | 955 | 110.8 $\pm$ 7.7            | 118.6 $\pm$ 7.3          | 524 (54.9)                    | 67 (7.0)       | 1.09 (0.78, 1.53)                                   |
| Hb-late $\geq$ 130       |     |                            |                          |                               |                |                                                     |
| Hb change < 8 g/L        | 109 | 130.3 $\pm$ 4.4            | 133.3 $\pm$ 2.5          | 66 (60.6)                     | 11 (10.1)      | 0.84 (0.40, 1.77)                                   |
| Hb change 8 ~ 15.9 g/L   | 127 | 123.0 $\pm$ 4.5            | 134.6 $\pm$ 4.2          | 85 (66.9)                     | 16 (12.6)      | Reference                                           |
| Hb change $\geq$ 16 g/L  | 122 | 116.1 $\pm$ 6.7            | 138.8 $\pm$ 8.1          | 79 (64.8)                     | 14 (11.5)      | 0.80 (0.41, 1.56)                                   |

Hb, hemoglobin; SGA, small for gestational age; RR, risk ratio; CI, confidence interval; aRR, adjusted risk ratio.

<sup>†</sup>Adjusted Model adjusted for maternal age, height, ethnicity, education level, average personal income, pre-pregnancy BMI, active or passive smoking, alcohol consumption, parity, gestational weight gain, newborn gender, iron-containing supplement, and Hb measurement interval.

\*P<0.001
